# Supplementary material
Source: PubMed Central journal article supplement (PMC8094807)
Supplement: NIHMS1686416-supplement-2.pdf [file NIHMS1686416-supplement-2.pdf]

## Supporting Information

### **N-terminal domain of TDP43 enhances liquid-liquid phase separation of globular proteins**

G. Campbell Carter<sup>1,2</sup>, Chia-Heng Hsiung<sup>1,2</sup>, Leman Simpson<sup>1</sup>, Haopeng Yang<sup>1</sup>, Xin Zhang<sup>\*1,2</sup>

<sup>1</sup>Department of Chemistry, <sup>2</sup>Department of Biochemistry and Molecular Biology, The Pennsylvania State University, University Park, Pennsylvania 16802, United States

Corresponding author: Xin Zhang (xuz31@psu.edu)

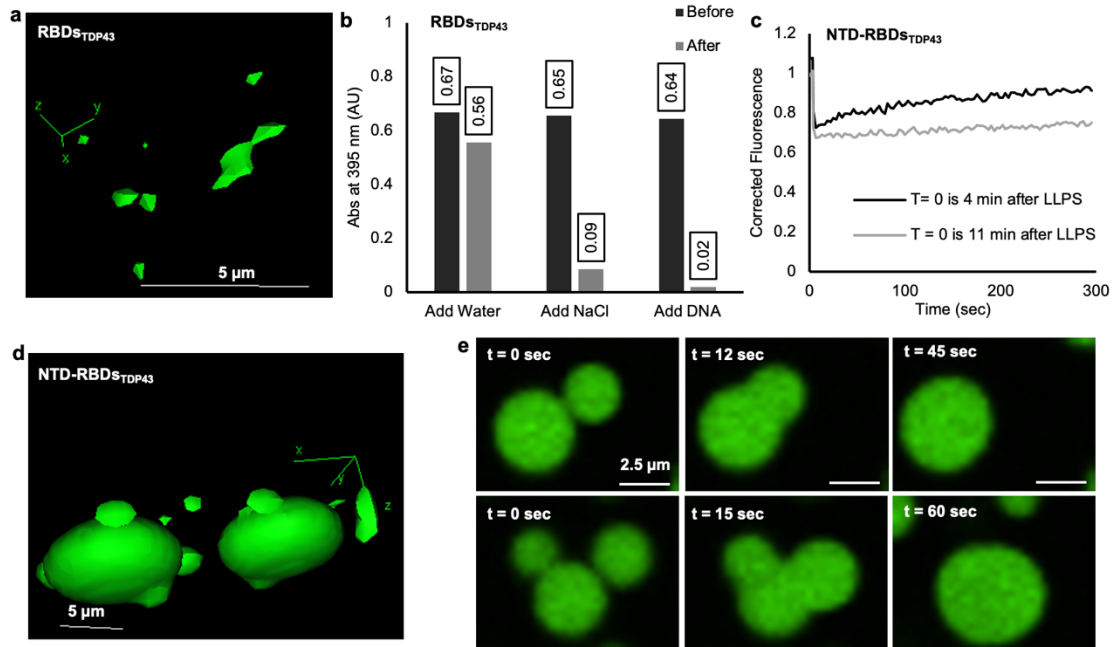

**Supplementary Figure S1.** (a), 3D reconstruction of 50  $\mu\text{M}$  RBD<sub>S<sub>TDP43</sub></sub> in 100 mM NaCl and 10% w/v PEG-3350. (b) Turbidity values of RBD<sub>S<sub>TDP43</sub></sub> to assess LLPS reversibility. Samples initially contain 50  $\mu\text{M}$  protein, 100 mM NaCl, and 10% PEG-3350. Additions are 20  $\mu\text{L}$  water, 20  $\mu\text{L}$  5 M NaCl, or 10  $\mu\text{L}$  1 mM TG8, a DNA oligo with a sequence known to bind TDP43. (c) FRAP recovery of NTD-RBD<sub>S<sub>TDP43</sub></sub> either 4 minutes or 11 minutes after initiating LLPS by dilution. Fluorescence values corrected to an unbleached droplet in the same frame. Samples contain 100  $\mu\text{M}$  unlabeled protein, 5  $\mu\text{M}$  protein labeled by fluorescein-maleimide, and 105 mM NaCl. (d) 3D reconstruction of 50  $\mu\text{M}$  NTD-RBD<sub>S<sub>TDP43</sub></sub> in 100 mM NaCl. 45  $\mu\text{M}$  protein is unlabeled, 5  $\mu\text{M}$  protein is labeled with fluorescein-maleimide. (e) Fusion of NTD-RBD<sub>S<sub>TDP43</sub></sub> droplets in 100  $\mu\text{M}$  protein, 100 mM NaCl. Frames selected from **Supplementary Movie S1**.

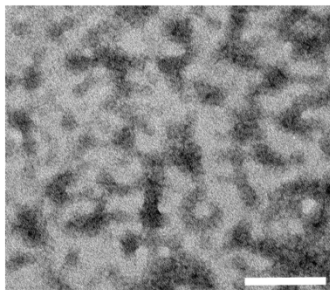

**Supplementary Figure S2.** TEM of 50  $\mu\text{M}$  NTD in 35 mM NaCl. Scale bar is 200 nm.

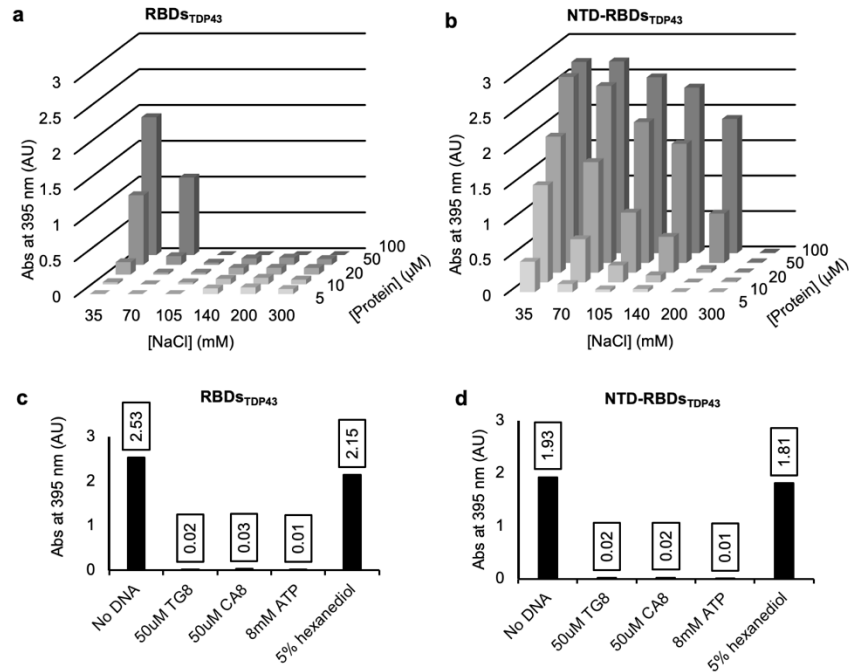

**Supplementary Figure S3. a-b**, Turbidity values for RBDs<sub>TDP43</sub> (**a**) and NTD-RBDs<sub>TDP43</sub> (**b**) used for Figure 1c. **c**, Turbidity of 50 μM RBDs<sub>TDP43</sub> in 35 mM NaCl, 10% w/v PEG-3350, and various additives known to affect LLPS. **d**, Turbidity of 50 μM NTD-RBDs<sub>TDP43</sub> in 100 mM NaCl and various additives known to affect LLPS.

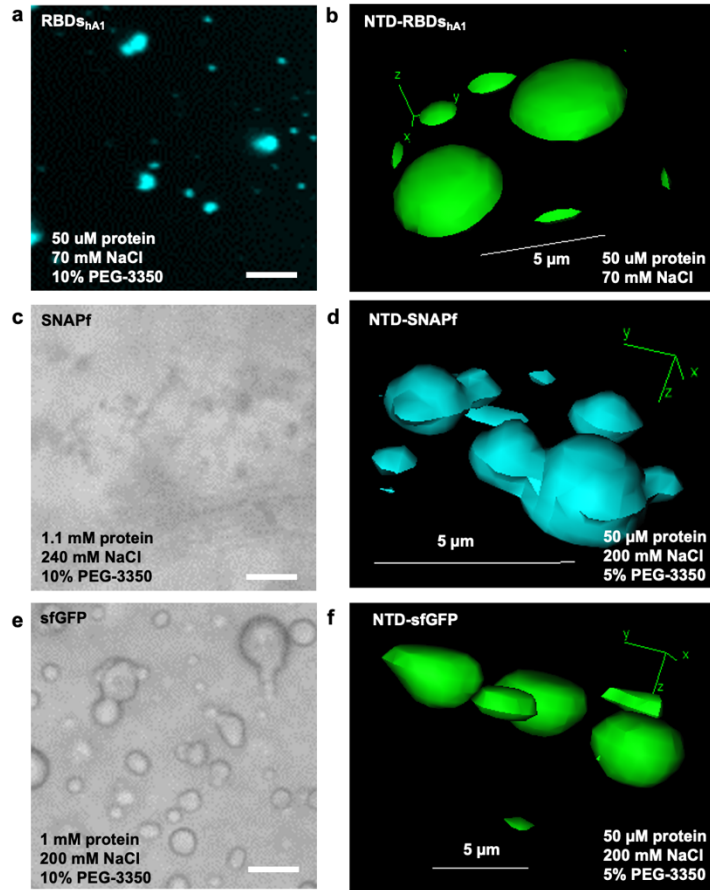

**Supplementary Figure S4.** **a**, Fluorescent confocal microscopy of 50  $\mu\text{M}$  RBD<sub>ShA1</sub> in 100 mM NaCl and 10% w/v PEG-3350. Sample prepared with 45  $\mu\text{M}$  unlabeled protein and 5  $\mu\text{M}$  protein labeled with coumarin via maleimide conjugation. Scale bar is 5  $\mu\text{m}$ . **b**, 3D reconstruction of 50  $\mu\text{M}$  NTD-RBD<sub>ShA1</sub> in 70 mM NaCl. Sample prepared with 45  $\mu\text{M}$  unlabeled protein and 5  $\mu\text{M}$  protein labeled with fluorescein via maleimide conjugation. Scale bar is 5  $\mu\text{m}$ . **c**, Brightfield image of SNAPf aggregates. Scale bar is 10  $\mu\text{m}$ . **d**, 3D reconstruction of 50  $\mu\text{M}$  NTD-SNAPf in 200 mM NaCl and 5% w/v PEG-3350. Sample labeled with 5  $\mu\text{M}$  coumarin attached to SNAPf ligand benzyl-guanine. Scale bar is 5  $\mu\text{m}$ . **e**, Brightfield image of sfGFP droplets. Scale bar is 10  $\mu\text{m}$ . **f**, 3D reconstruction of 50  $\mu\text{M}$  NTD-sfGFP in 200 mM NaCl and 5% w/v PEG-3350. Scale bar is 5  $\mu\text{m}$ .

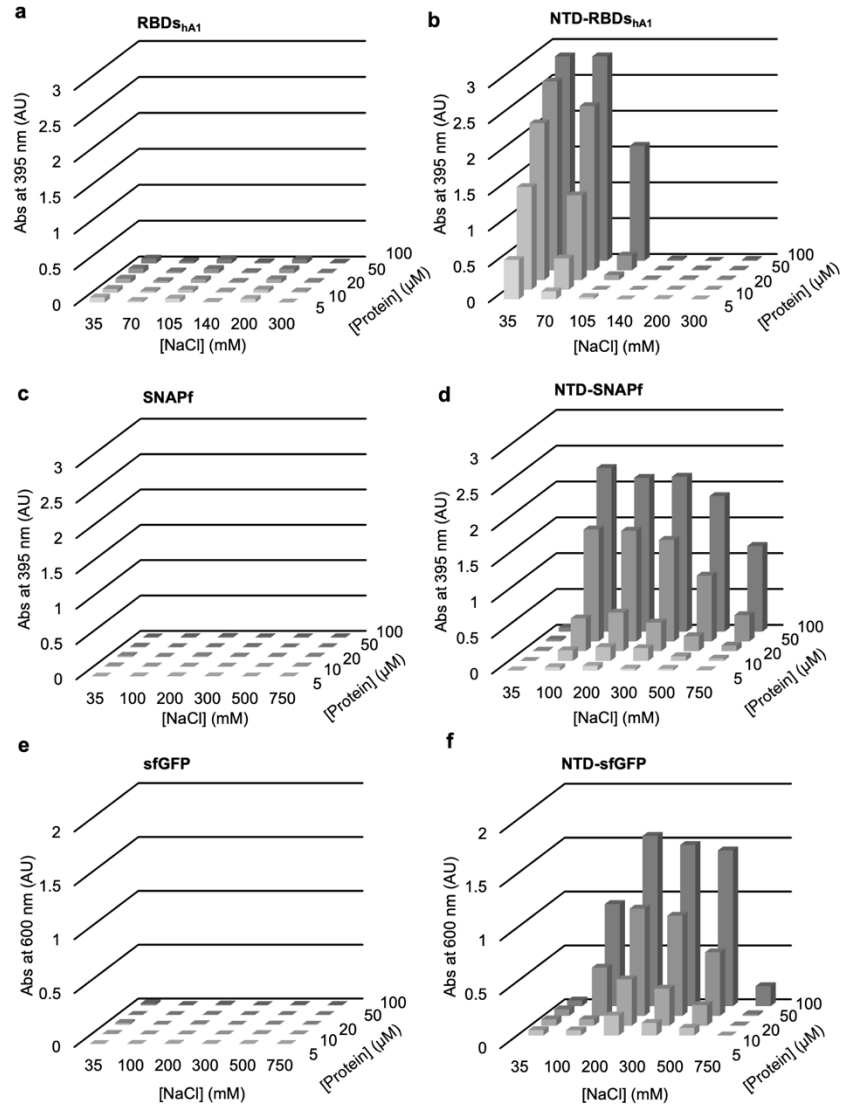

**Supplementary Figure S5. a-b,** Turbidity values for RBD<sub>ShA1</sub> (a) and NTD-RBD<sub>ShA1</sub> (b) used in Figure 2c-d. **c-d,** Turbidity values for SNAPf (c) and NTD-SNAPf (d) used in Figure 2f-g. Samples contain 5% w/v PEG-3350. **e-f,** Turbidity values for sfGFP (e) and NTD-sfGFP (f) used in Figure 2i-j. Samples contain 5% w/v PEG-3350.

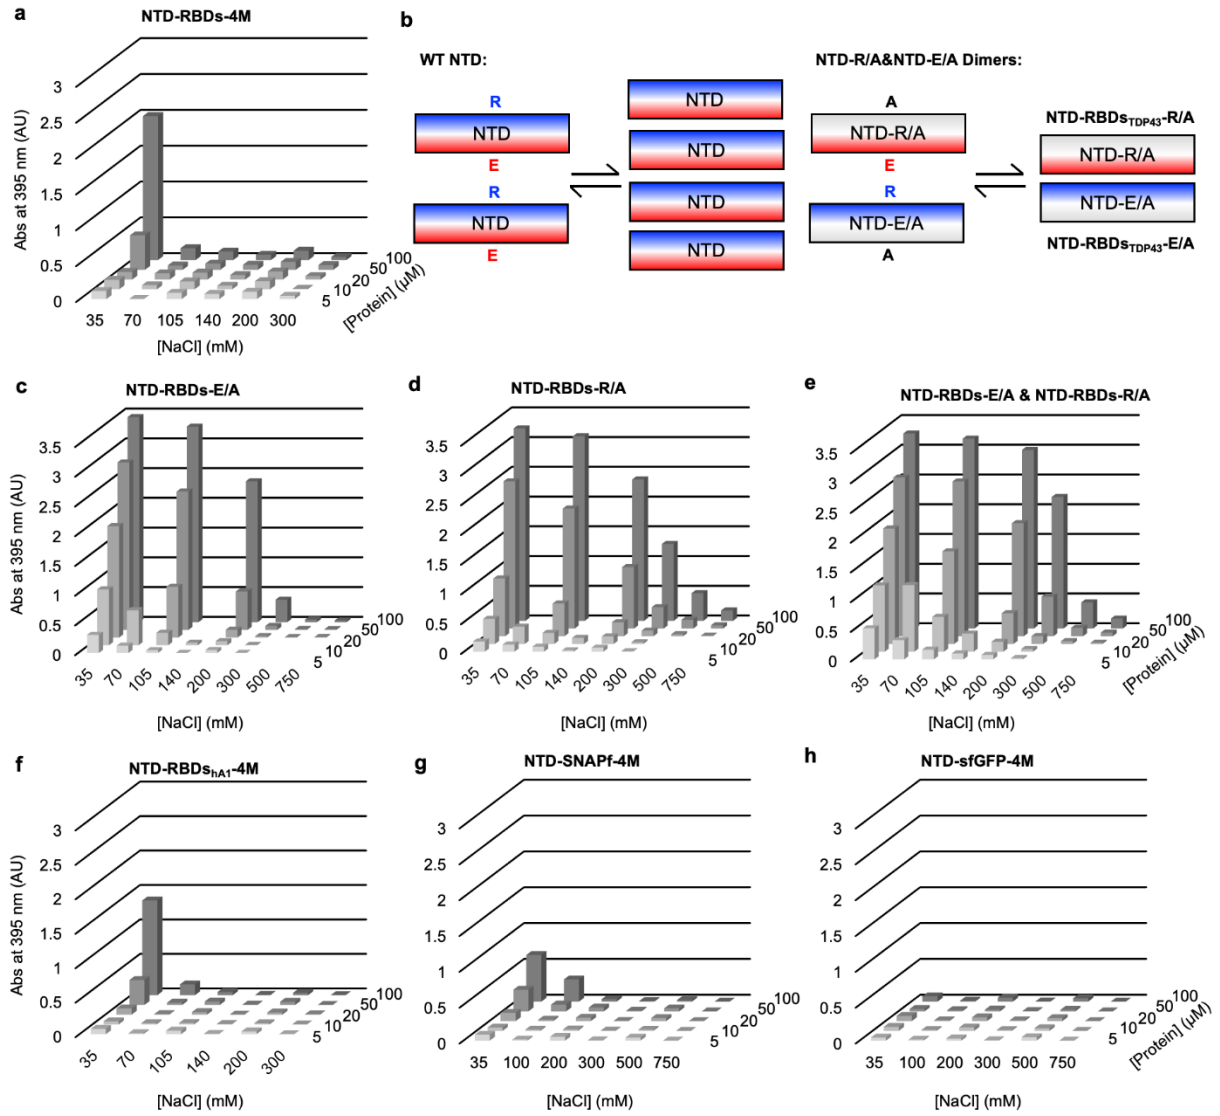

**Supplementary Figure S6.** **a**, Turbidity for NTD-RBD<sub>STDP43</sub>-4M (E17A/E31A/R52A/R55A) used in Figure 3b. **b**, Schematic for creating NTD-based dimers by mutating one or the other side of the oligomerization interface. **c-e**, Turbidity values for NTD-RBD<sub>STDP43</sub> E/A (E17A/E31A) in **a**, NTD-RBD<sub>STDP43</sub> R/A (R52A/R55A) in **b**, or NTD-RBD<sub>STDP43</sub> E/A complexed with NTD-RBD<sub>STDP43</sub> R/A in **c**. E/A + R/A sample consists of 50% E/A and 50% R/A. Samples contain 10% w/v PEG-3350. **f-h**, Turbidity values for oligomerization-deficient mutants of NTD-RBD<sub>hA1</sub>-4M (**f**), NTD-SNAPf-4M (**g**), and NTD-sfGFP-4M (**h**). NTD-SNAPf-4M and NTD-sfGFP-4M samples contain 5% w/v PEG-3350.

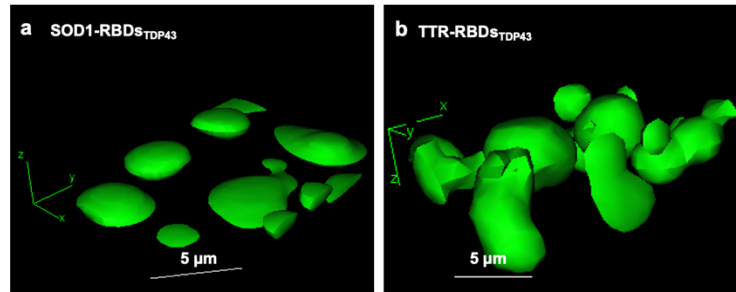

**Supplementary Figure S7. a**, 3D reconstruction of 50  $\mu\text{M}$  SOD1-RBD<sub>STDP43</sub> in 100 mM NaCl and 10% w/v PEG-3350. Protein is 45  $\mu\text{M}$  unlabeled and 5  $\mu\text{M}$  labeled by fluorescein conjugated via maleimide. Scale bar is 5  $\mu\text{m}$ . **b**, 3D reconstruction of 50  $\mu\text{M}$  TTR-RBD<sub>STDP43</sub> in 100 mM NaCl and 10% w/v PEG-3350. Protein is 45  $\mu\text{M}$  unlabeled and 5  $\mu\text{M}$  labeled by fluorescein conjugated via maleimide. Scale bar is 5  $\mu\text{m}$ .



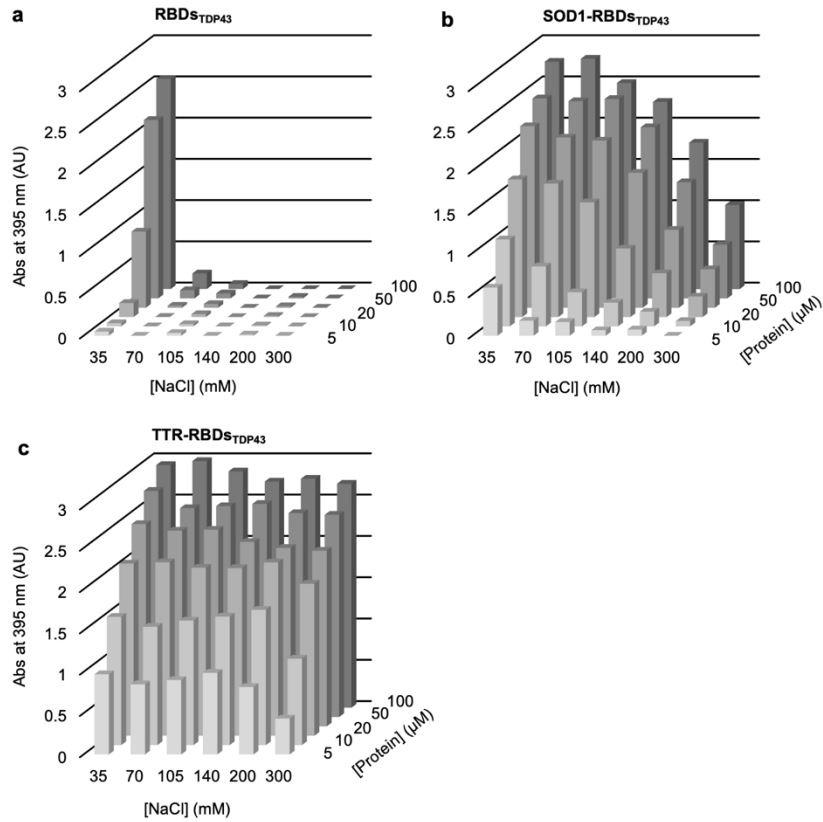

**Supplementary Figure S8.** **a**, Turbidity values of RBD<sub>STDP43</sub> at varying salt and protein concentrations. All samples contain 10% w/v PEG-3350. **b**, Turbidity values of SOD1-RBD<sub>STDP43</sub> at varying salt and protein concentrations. All samples contain 10% w/v PEG-3350. **c**, Turbidity values of TTR-RBD<sub>STDP43</sub> at varying salt and protein concentrations. All samples contain 10% w/v PEG-3350.

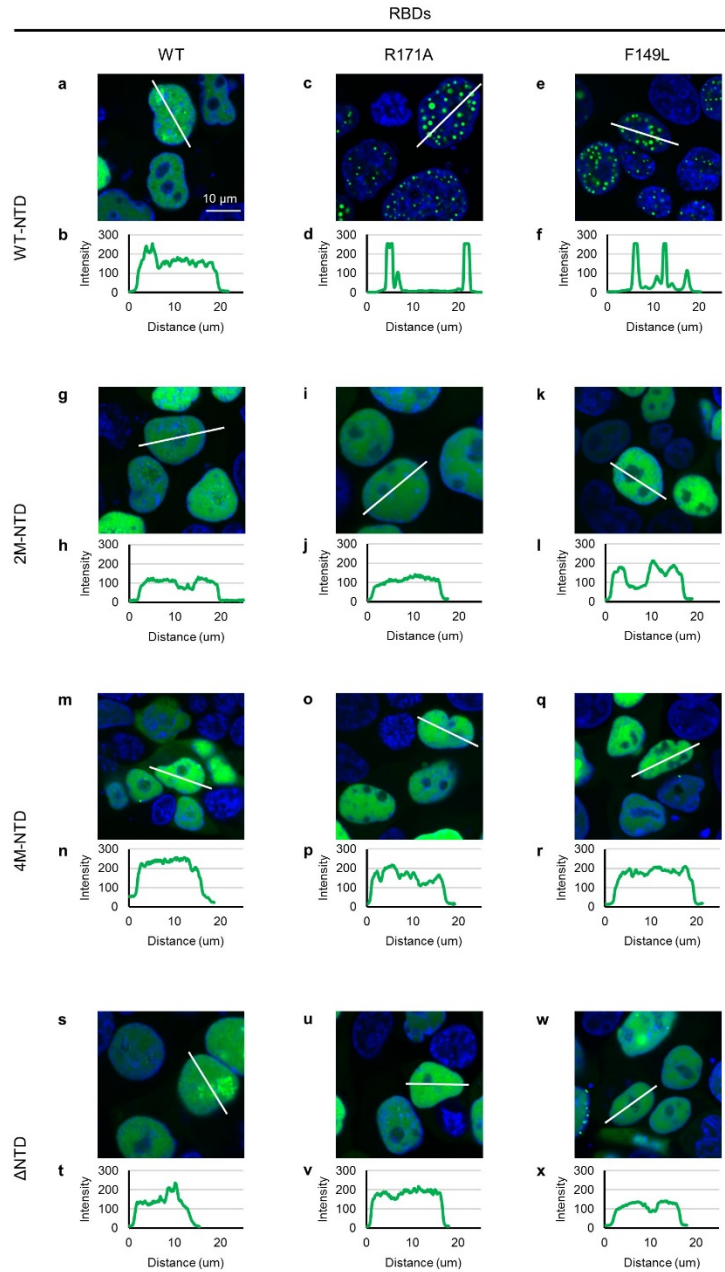

**Supplementary Figure S9.** Intensity profile of GFP fluorescence corresponding to marked cross-sections (white line) of images from Figure 5. Images with cross-sections and corresponding intensity profiles for WT, R171A, and F149L RBDs constructs respectively, with either WT NTD (**a+b, c+d, e+f**), 2M-NTD (**g+h, i+j, k+l**), 4M-NTD (**m+n, o+p, q+r**), or  $\Delta$ NTD (**s+t, u+v, w+x**).

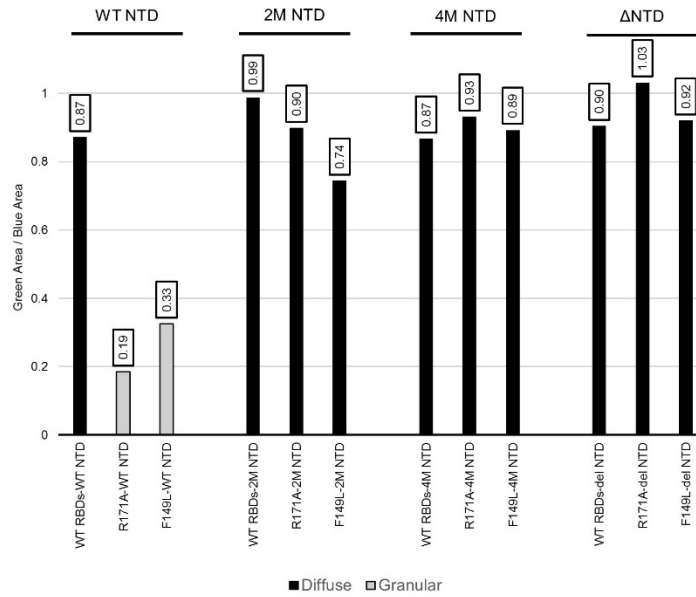

**Supplementary Figure S10.** Quantification of distribution of EGFP-TDP43 compared to nuclear stain. From expanded images used in Figure 5, surface area of EGFP-TDP43 fluorescence (green) was compared to nuclear stain area (blue). Values depicted are green area/blue area (unitless). Black bars: diffuse signal. Grey bars: granular signals.

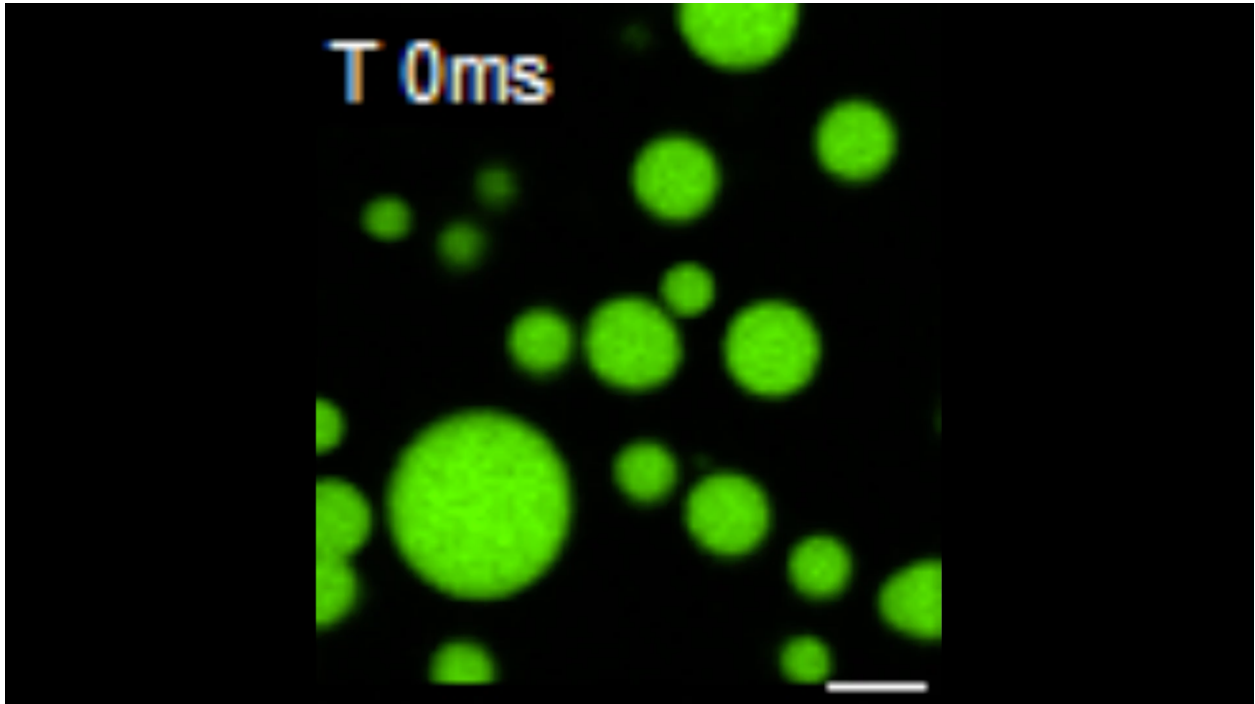

**Supplementary Movie S1.** Fusion of NTD-RBD<sub>STDP43</sub> droplets in 100  $\mu$ M protein, 100 mM NaCl.
